# Supplementary material
Source: PubMed Central journal article supplement (PMC8964757)
Supplement: 41598_2022_8320_MOESM1_ESM.pdf [file 41598_2022_8320_MOESM1_ESM.pdf]

## SUPPORTING INFORMATION

### In silico analysis of SARS-CoV-2 proteins as targets for clinically available drugs

Wallace K.B. Chan<sup>1,2\*</sup>, Keith M. Olson<sup>1,2\*</sup>, Jesse W. Wotring<sup>3</sup>, Jonathan Z. Sexton<sup>3,4</sup>,  
Heather A. Carlson<sup>3</sup>, John R. Traynor<sup>1,2,3,†</sup>

<sup>1</sup>Department of Pharmacology, <sup>2</sup> Edward F Domino Research Center, <sup>3</sup>Department of Medicinal Chemistry, <sup>4</sup>Department of Internal Medicine, University of Michigan, Ann Arbor, MI 48190, USA

### Table of contents

#### 1. Supporting Figures

- **Figure S1:** Flowchart for preparation of SARS-CoV-2 protein structures
- **Figure S2:** Z score distributions of drugs for each predicted site
- **Figure S3:** Molecular weight dependence of scoring methods
- **Figure S4:** Protein RMSDs from molecular dynamics simulations trajectories
- **Figure S5:** Drug RMSDs from trajectories of successful systems
- **Figure S6:** Drug RMSDs from trajectories of failed systems
- **Figure S7:** Domperidone is predicted to displace ADP ribose from the ADRP domain of NSP3
- **Figure S8:** Avanafil interacts with an allosteric site on NSP15
- **Figure S9:** Levomefolic acid interacts with a putative allosteric site formed between the trimeric spike protein complex
- **Figure S10:** Amprenavir interacts stably with a putative allosteric site on the spike protein
- **Figure S11:** Calcipotriol maintains a stable interaction with the RBD of the spike protein
- **Figure S12.** Nintedanib interacts with the RNA-binding domain of the nucleocapsid protein

#### 2. Supporting Tables

- **Table S1.** Homology Model Statistics and Modeling Data
- **Table S2.** Site Nomenclature and Information 1 Homology Model Template PDB ID
- **Table S3:** 'Medium Confidence Hits' and Putative Mechanism of Hits with a z-score > 1.8 at < 10 sites
- **Table S4:** List of 132 Hits
- **Table S5:** Reference drugs identified using FQ score
- **Table S6.** Numbers of ions used in MD Simulations

#### 3. Supporting References

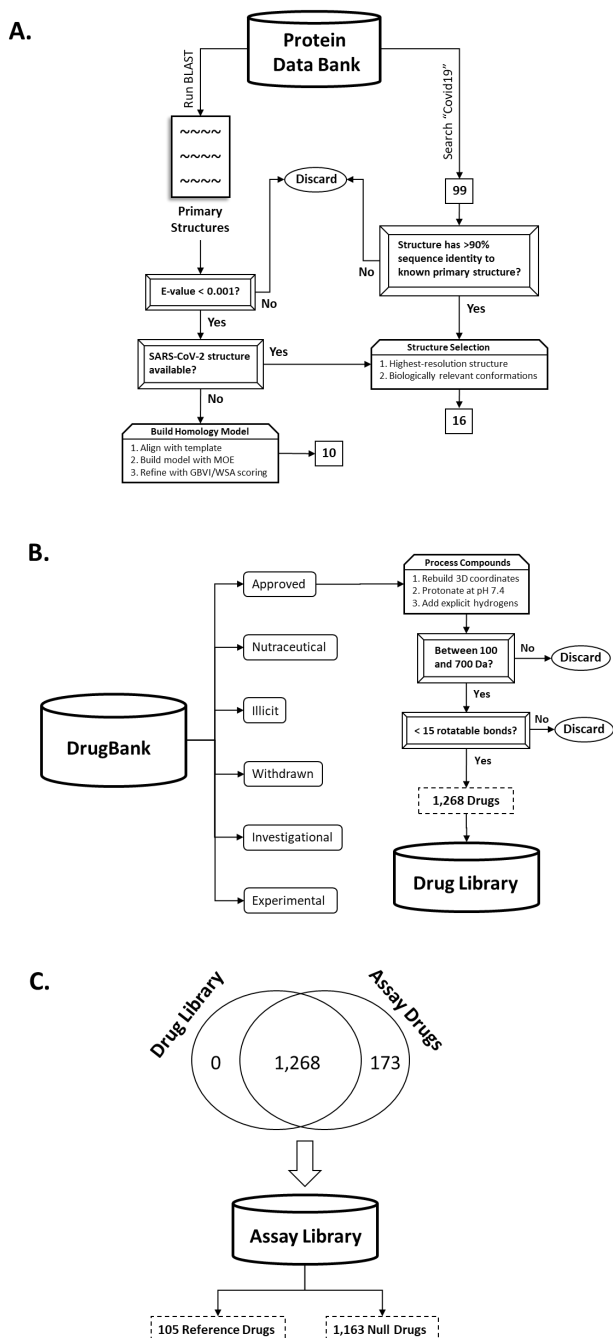

**Fig. S1. Flowchart for preparation of SARS-CoV-2 protein structures and drug library for docking. (A)** SARS-CoV-2 protein structures were selected from available crystal structures, and where unavailable, homology models were created from related coronaviruses. **(B)** FDA-approved drugs were extracted from DrugBank and prepared for downstream docking experiments. **(C)** From the assay library, 1,268 FDA-approved drugs overlapped with our *in silico* drug library, out of which 105 small molecule drugs had  $IC_{50} \leq 2 \mu M$  against Huh7 cells. These were termed 'Reference Drugs'. The flowcharts were prepared using PowerPoint software.

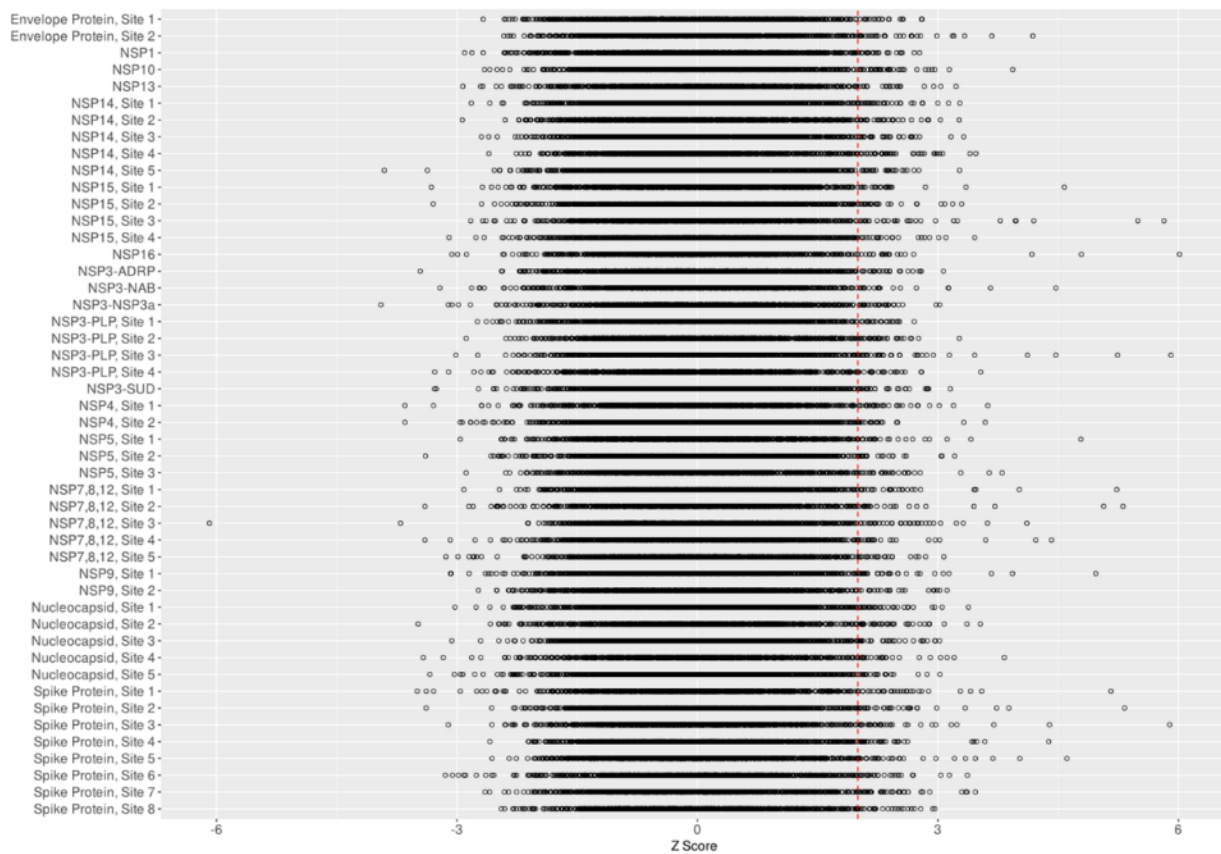

**Fig. S2. Z score distributions of drugs for each predicted site.** Each black open circle represents a single FDA-approved drug. The dashed red line depicts the Z score cutoff at 2. The plot was generated with R language using the ggplot2 package.

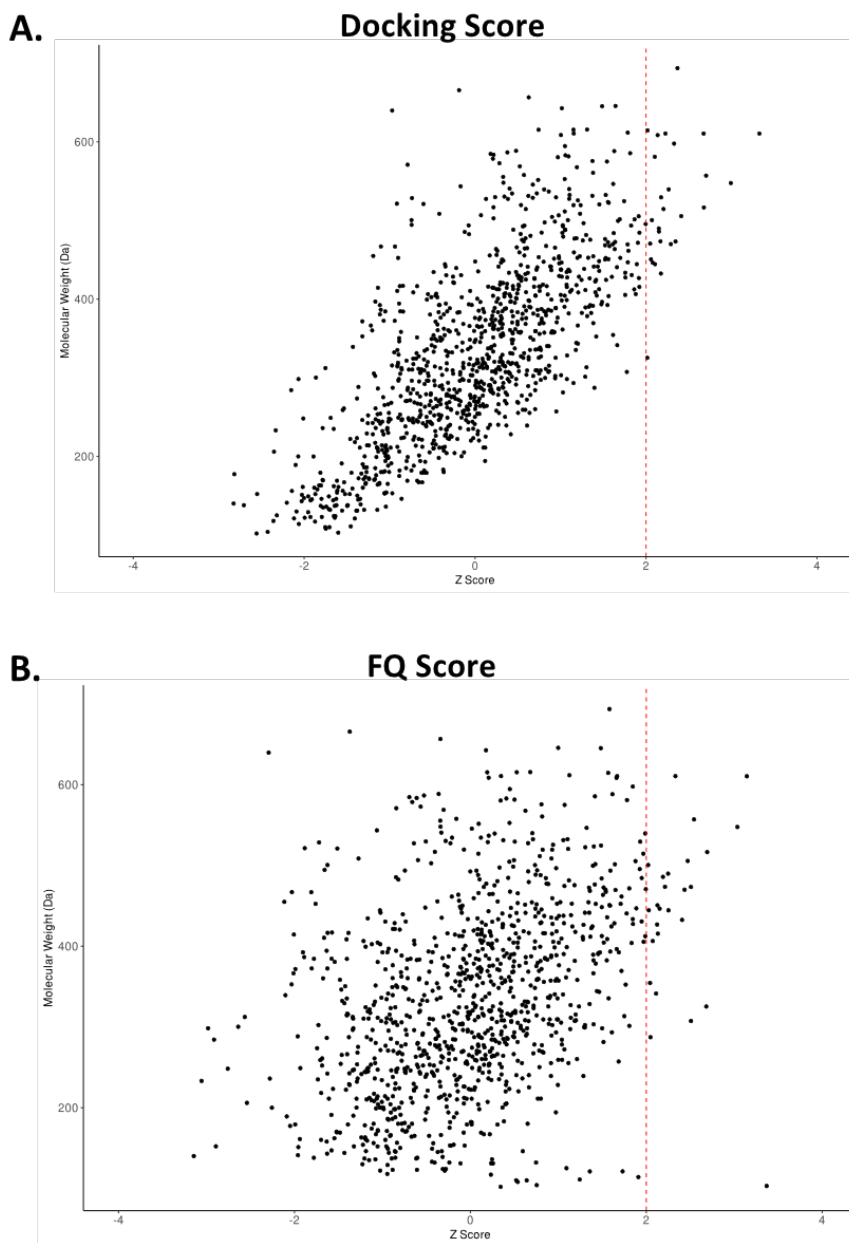

**Fig. S3. Molecular weight dependence of scoring methods.** The prioritized drugs from site 6 of the spike protein are shown using different scoring methods. (A.) A strong positive correlation was observed between the Z score and molecular weight for the prioritized drugs when using the docking score alone. (B.) However, utilizing the FQ score minimized the positive correlation. The dashed red line represents the Z score cutoff at 2. Plots were generated with R programming language and the ggplot2 package.

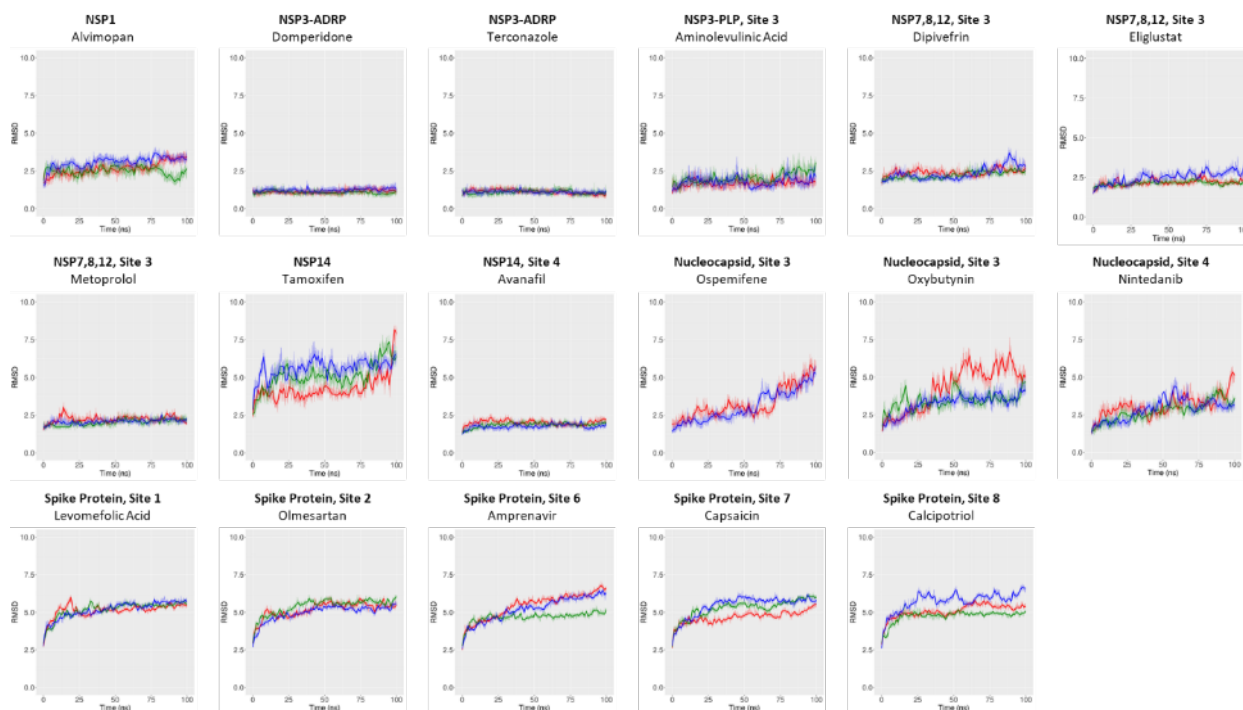

**Fig. S4. Protein RMSDs from molecular dynamics simulations trajectories.** RMSD calculations were performed using the peptide backbone (C, C $\alpha$ , N). Runs 1, 2, and 3 are colored red, green, and blue, respectively. Systems with larger RMSD display the cases where drugs migrated to symmetry-related sites. Plots were generated with R programming language and the ggplot2 package.

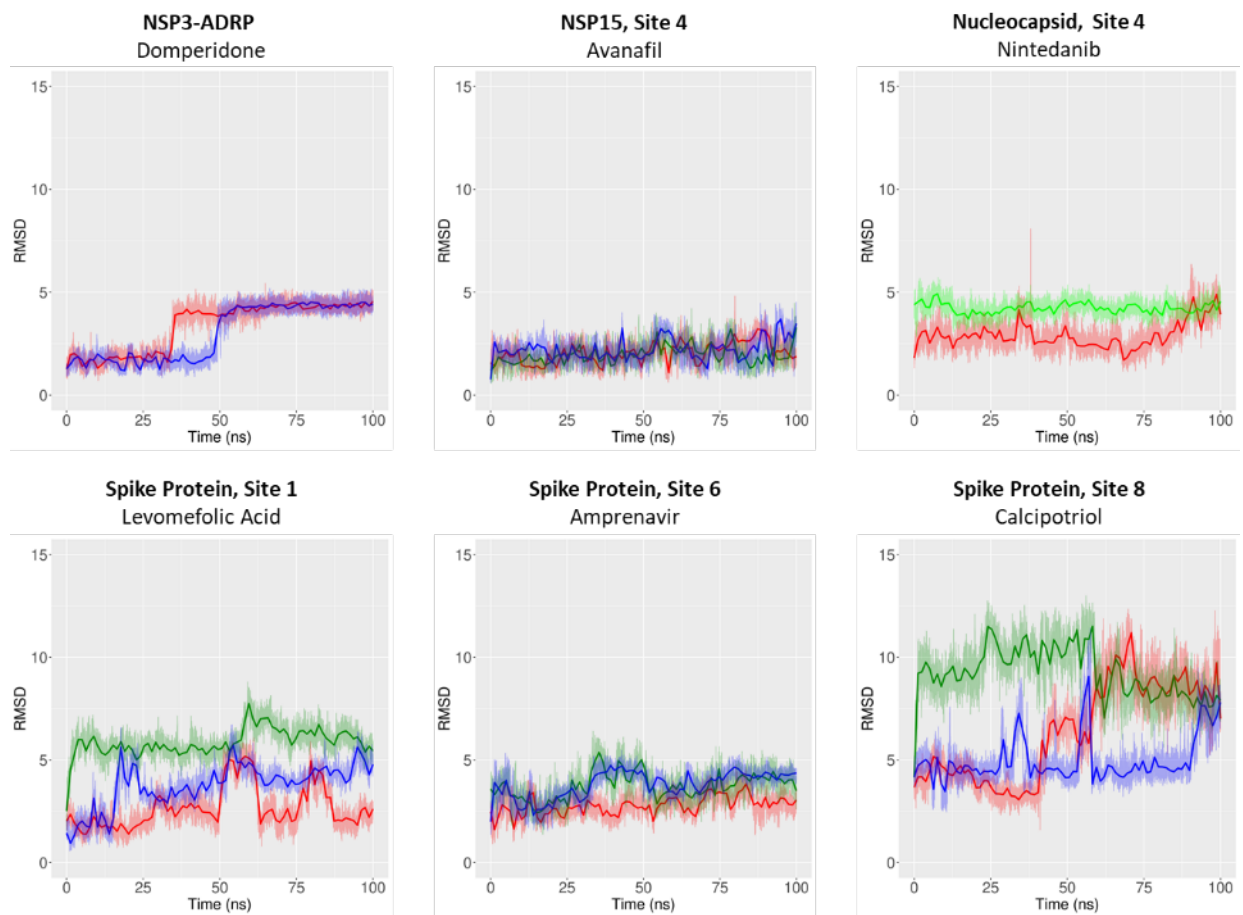

**Fig. S5. Drug RMSDs from trajectories of successful systems.** RMSD calculations were performed using the heavy atoms (i.e., non-hydrogen atoms) of the drug. Runs 1, 2, and 3 are colored red, green, and blue, respectively. Plots were generated with R programming language and the ggplot2 package.

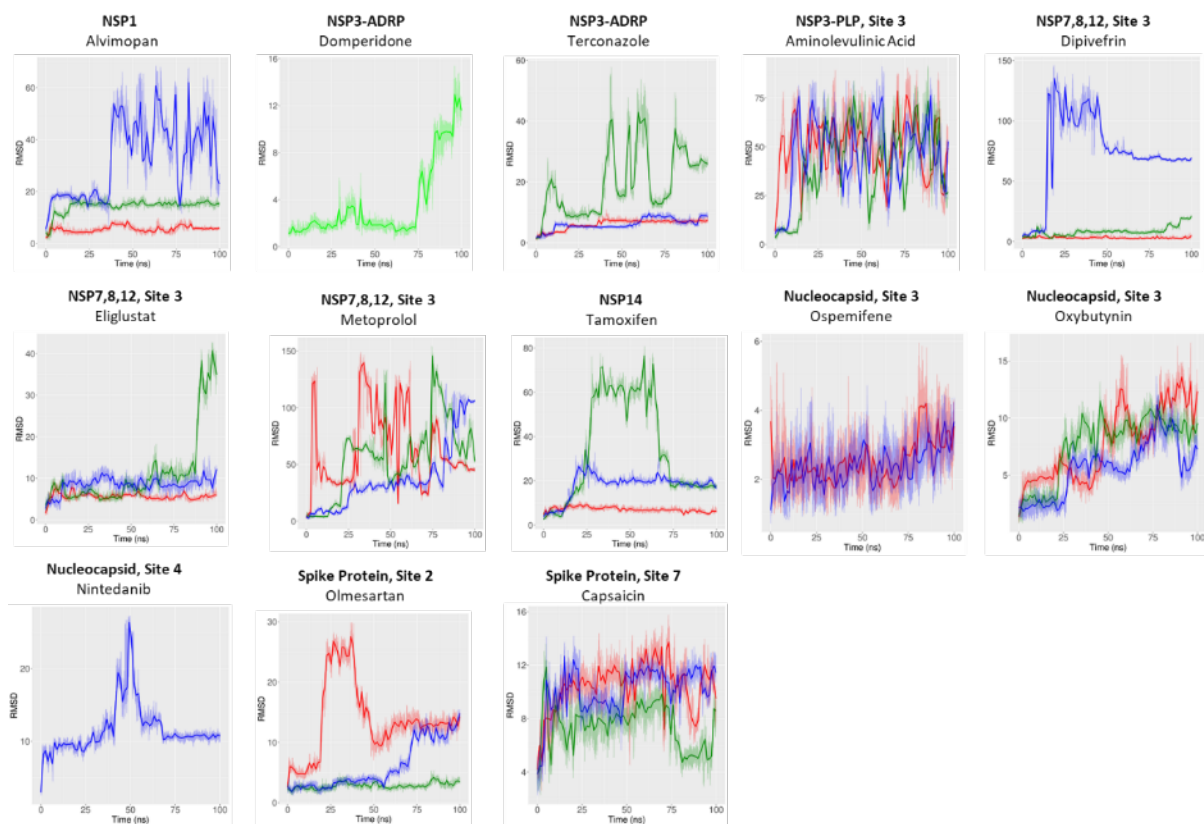

**Fig. S6. Drug RMSDs from trajectories of failed systems.** RMSD calculations were performed using the heavy atoms (i.e., non-hydrogen atoms) of the drug. Runs 1, 2, and 3 are colored red, green, and blue, respectively. Plots were generated with R programming language and the ggplot2 package.

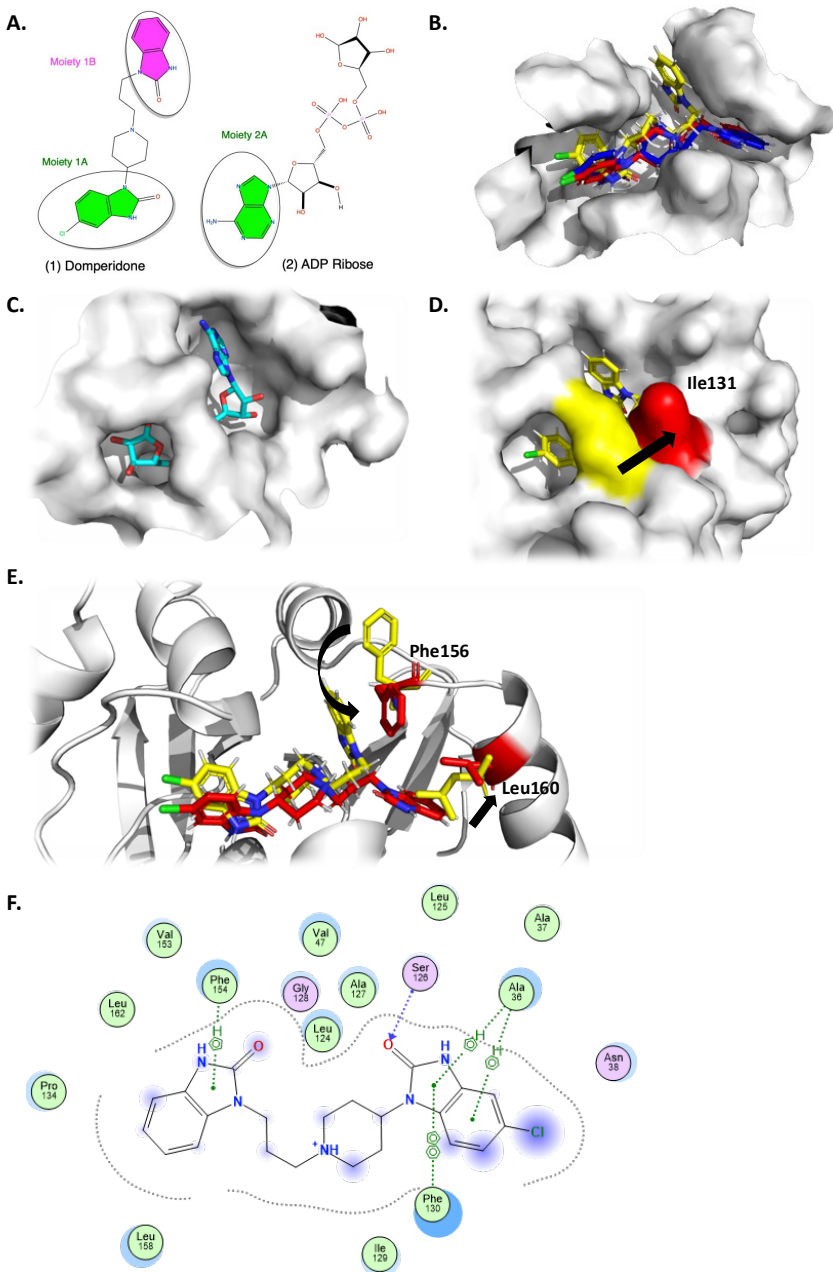

**Fig. S7. Domperidone is predicted to displace ADP ribose from the ADRP domain of NSP3.** (A) The chemical structures of domperidone (1) and ADP ribose (2), with Moiety 1. (B) The final snapshots from runs 1 and 3 (red and blue, respectively) are displayed in comparison with the original docked pose (yellow). (C) ADP ribose (cyan) binds to the active site of the ADRP domain of NSP3 (PDB: 6WOJ). (D) Upon achieving a stable interaction, domperidone was observed to cause Ile131 to move outwards, opening up the 'clamp' seen over the ribose on ADP ribose prior to hydrolysis. (E) Furthermore, Leu160 moves away to reveal a cryptic site that allows for the



accommodation of the non-chlorinated 1,3-benzodiazol-2-one group of domperidone, which is further stabilized with Phe156. For both (**D**) and (**E**), the original docked system (yellow) was compared with the final frame of run 1 (red). (**F**) A 2D interaction map of domperidone bound in the system with final frame of first MD simulation replicate. Graphics were generated using PyMOL and MOE.

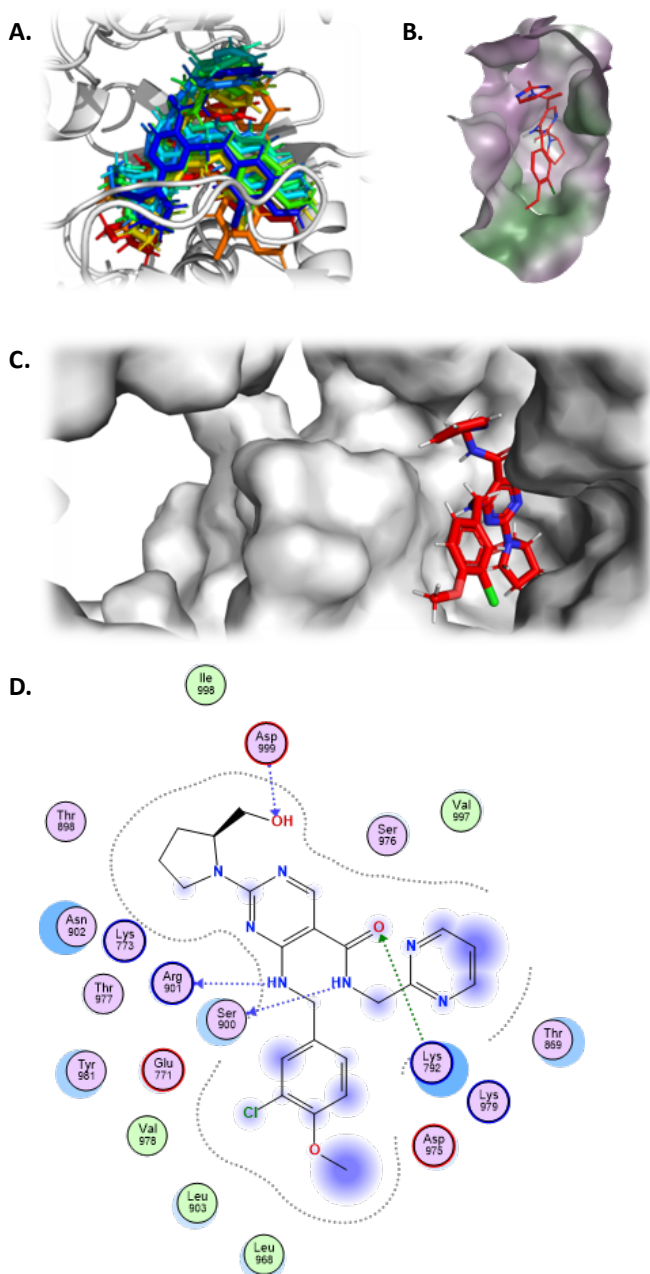

**Fig. S8. Avanafile interacts with an allosteric site on NSP15.** (A.) Representative frames from run 1 are shown in 10 ns increments (blue → green → red). (B.) Hydrophobic surface representation of the putative allosteric site to which avanafile binds was determined using MOE, where green and purple denote hydrophobicity and hydrophilicity, respectively. (C.) Avanafile is situated in an exposed pocket that is readily accessible to the exterior of the protein via a solvent channel. (D.) A 2D interaction map of avanafile with the system with final frame of first MD simulation replicate. Molecular graphics were generated using PyMOL and MOE.

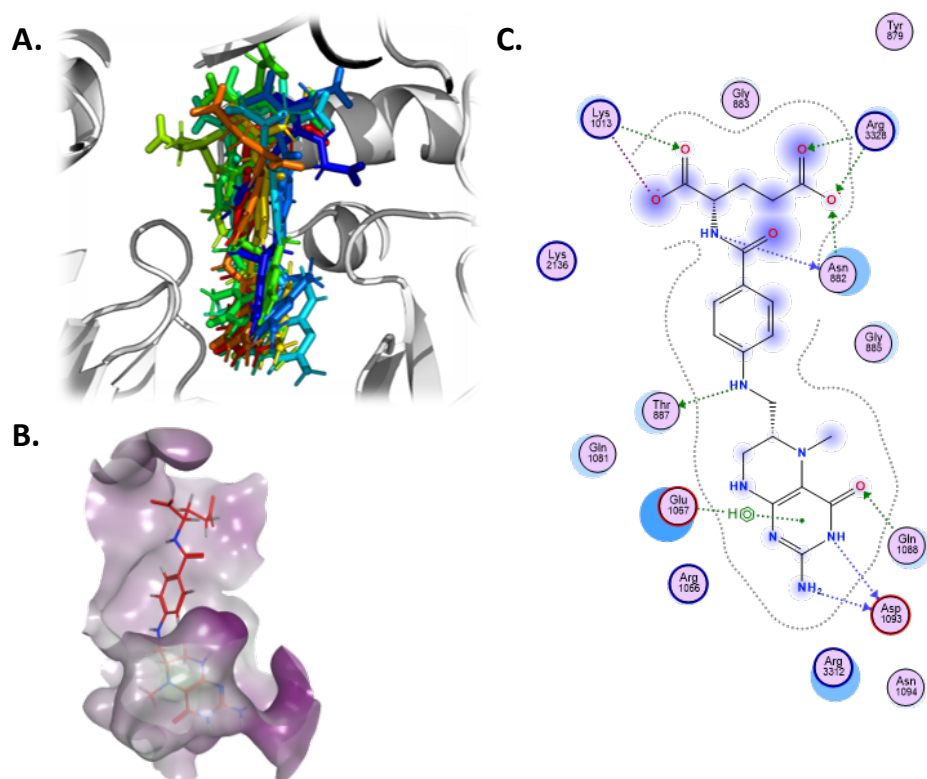

**Fig. S9. Levomefolic acid interacts with a putative allosteric site formed between the trimeric spike protein complex. (A.)** Representative frames from run 1 are shown in 10 ns increments (blue → green → red). **(B.)** Hydrophobic surface representation of the putative allosteric site to which levomefolic acid binds was determined using MOE, where green and purple denote hydrophobicity and hydrophilicity, respectively. **(C.)** A 2D interaction map of levomefolic acid with the system with final frame of first MD simulation replicate. Molecular graphics were generated using PyMOL and MOE.

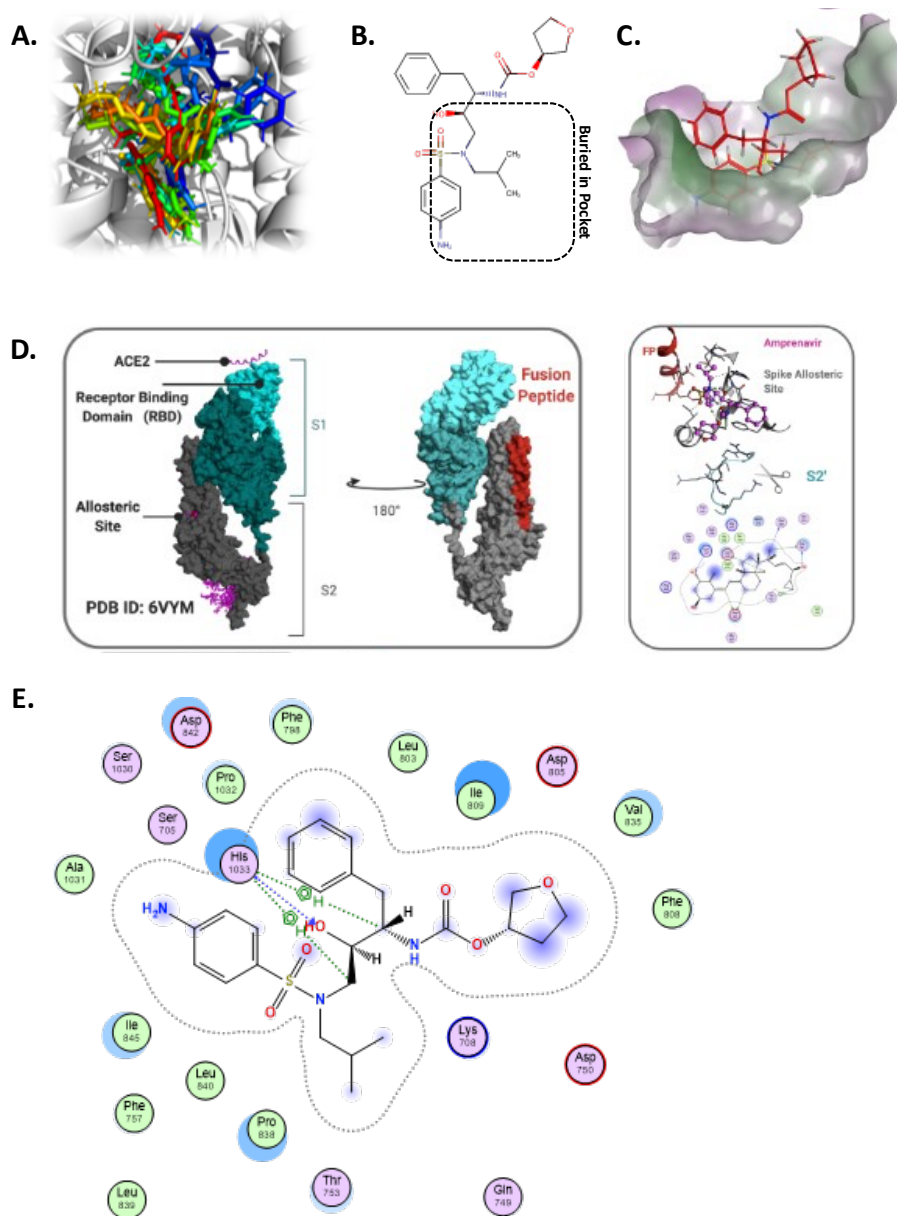

**Fig. S10. Amprenavir interacts stably with a putative allosteric site on the spike protein.** (A.) Representative frames from run 1 are shown in 10 ns increments (blue → green → red). (B.) Part of amprenavir remains buried in the predicted site throughout the simulations. MarvinSketch was used for drawing and displaying the 2D chemical structure, MarvinSketch 18.18.0, ChemAxon (<https://www.chemaxon.com>). (C.) Hydrophobic surface representation of the putative allosteric site to which amprenavir binds was determined using MOE, where green and purple denote hydrophobicity and hydrophilicity, respectively. (D.) (Left) Single monomer of homotrimer S protein. Domains colored RBD (Cyan), S1 (cyan marine). (Right) Amprenavir to spike allosteric site. 2D generation map of docked pose. Created with biorender.com. (E.) A 2D interaction map of amprenavir with the system with final frame of first MD simulation replicate. Molecular graphics were generated using PyMOL and MOE.

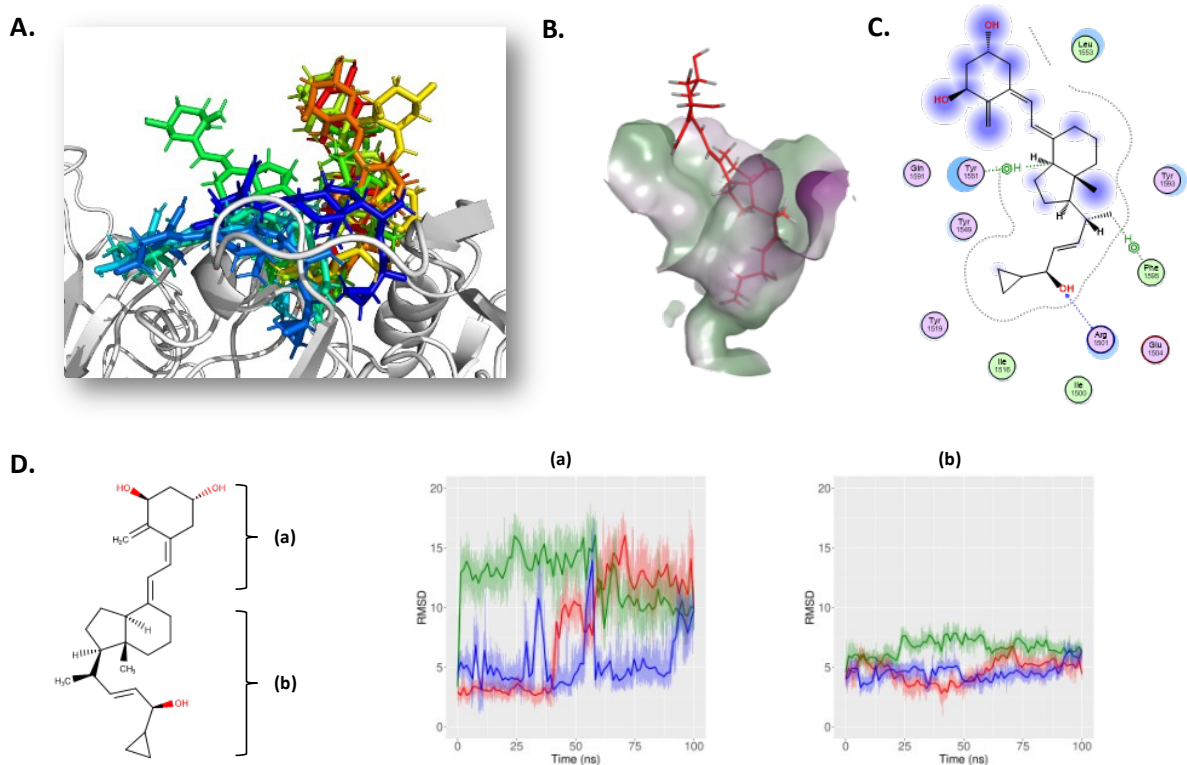

**Fig. S11. Calcipotriol maintains a stable interaction with the RBD of the spike protein.** (A.) Representative frames from run 1 are shown in 10 ns increments (blue → green → red). (B.) Hydrophobic surface representation of the putative allosteric site to which amprenavir binds was determined using MOE, where green and purple denote hydrophobicity and hydrophilicity, respectively. (C.) A 2D interaction map of calcipotriol with the system. (D.) Calcipotriol contained both (a) solvent-exposed and (b) buried regions. The heavy atoms (i.e., non-hydrogen atoms) were used to calculate drug RMSDs from the trajectories for both regions individually. Runs 1, 2, and 3 are colored red, green, and blue, respectively. MarvinSketch was used for drawing and displaying the 2D chemical structure, MarvinSketch 18.18.0, ChemAxon (<https://www.chemaxon.com>). Molecular graphics were generated using PyMOL and MOE.

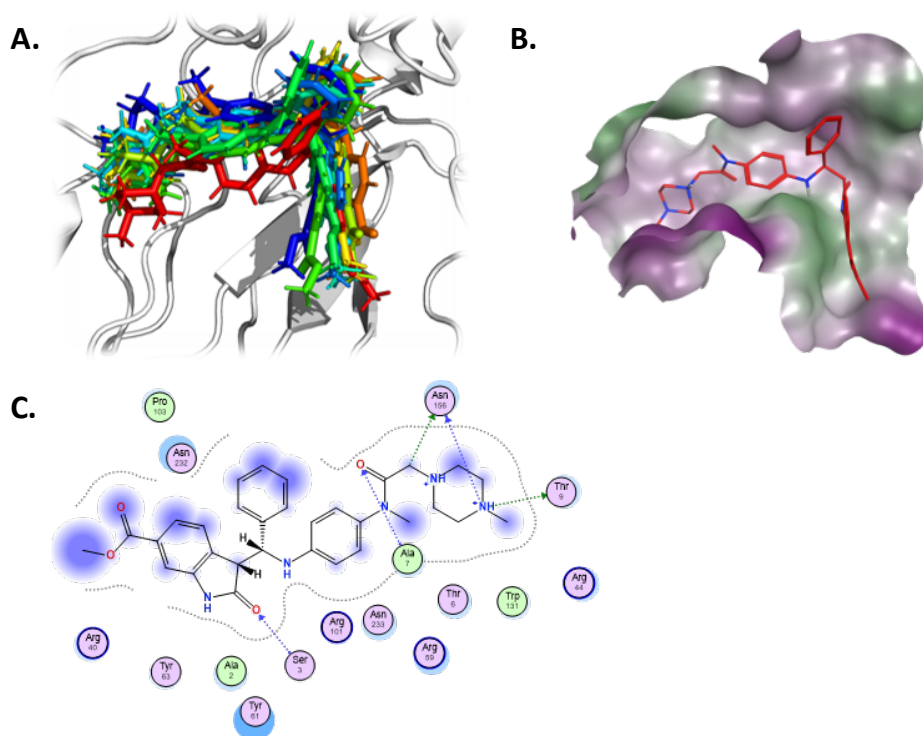

**Fig.S12. Nintedanib interacts with the RNA-binding domain of the nucleocapsid protein.** (A) Representative frames from run 1 are shown in 10 ns increments (blue → green → red). (B) Hydrophobic surface representation of the putative allosteric site to which nintedanib binds was determined using MOE, where green and purple denote hydrophobicity and hydrophilicity, respectively. (C.) A 2D interaction map of nintedanib with the system with final frame of first MD simulation replicate. Molecular graphics were generated using PyMOL and MOE.

**Table S1.** Homology Model Statistics and Modeling Data

| <u>Protein or Domain</u> | <u>Species</u>      | <u>E-value</u> | <u>Template PDB ID</u> | <u>% ID</u> | <u>Region</u> | <u>RMSD to Mean</u> | <u>C<math>\alpha</math> RMSD to Mean</u> | <u>Contact Energy</u> | <u>Packing Score</u> | <u>GB/VI</u> | <u>U</u> | <u>E<sub>sol</sub></u> | <u>E<sub>ele</sub></u> | <u>E<sub>vdw</sub></u> | <u>E<sub>bond</sub></u> | <u>Atom Clashes</u> | <u>BB Bond Outliers</u> | <u>BB Angle Outliers</u> | <u>BB Torsion Outliers</u> | <u>Rotamer Outliers</u> |
|--------------------------|---------------------|----------------|------------------------|-------------|---------------|---------------------|------------------------------------------|-----------------------|----------------------|--------------|----------|------------------------|------------------------|------------------------|-------------------------|---------------------|-------------------------|--------------------------|----------------------------|-------------------------|
| NSP1                     | SARS                | 4.603e-60,     | 2GDT                   | 86%         | 2-116         | 0.1601              | 0.00000                                  | -106.62647            | 2.1425035            | -32994       | -8644    | -1796                  | -9102                  | 14                     | 444                     | 0                   | 0                       | 4                        | 4                          | 0                       |
| NSP3a                    | SARS                | 2.74E-48       | 2GRI                   | 79%         | 17-112        | 0.0000              | 0.00000                                  | -80.180763            | 2.2122338            | -26454       | -6145    | -2470                  | -6852                  | 217                    | 491                     | 9                   | 0                       | 1                        | 2                          | 0                       |
| NSP3 SUD                 | SARS                | 1.91E-126      | 2W2G                   | 75%         | 1-264         | 0.0776              | 0.03018                                  | -465.59048            | 2.2028725            | -143896      | -38098   | -6419                  | -40012                 | -204                   | 2117                    | 8                   | 3                       | 20                       | 13                         | 0                       |
| NSP3 NAB                 | SARS                | 2.98E-49       | 2K87                   | 82%         | 2-92          | 0.1494              | 0.00000                                  | -61.182095            | 2.1671281            | -22871       | -5925    | -1592                  | -6277                  | -19                    | 371                     | 0                   | 0                       | 2                        | 4                          | 0                       |
| NSP 4                    | Mouse Hepatitis A59 | 2.47E-23       | 3VCB                   | 60%         | 5-94          | 0.4073              | 0.24649                                  | -62.182476            | 2.1781962            | -22020       | -5164    | -1031                  | -6574                  | 292                    | 1119                    | 23                  | 7                       | 10                       | 7                          | 0                       |
| NSP13 (dimer)            | SARS                | 0              | 6JYT                   | 100%        | 3-603         | 0.0183131           | 0.007030345                              | -873.005              | 2.2819099            | -468183      | -112055  | -18909                 | -119831                | 2262                   | 5514                    | 68                  | 12                      | 30                       | 65                         | 5                       |
| NSP14                    | SARS                | 0              | 5C8S                   | 95%         | 1-527         | 0.286933            | 0.2587229                                | -809.2572             | 2.1527419            | -383837      | -91606   | -19052                 | -99075                 | 2099                   | 5370                    | 97                  | 0                       | 17                       | 10                         | 5                       |
| E Protein (Pentamer)     | SARS                | 1.01E-23       | 5X29                   | 89%         | 20-81         | 0.8426              | 0.76003                                  | -118.68491            | 2.1943591            | -1364        | -245     | -562                   | -513                   | 22                     | 245                     | 115                 | 4                       | 7                        | 19                         | 3                       |
| Nucleocapsid CTD         | SARS                | 4.65E-66       | 2CJR                   | 96%         | 11-128        | 0.0000              | 0.00000                                  | -258.84213            | 2.177073             | -163763      | -40916   | -6551                  | -43357                 | 435                    | 2006                    | 44                  | 19                      | 9                        | 14                         | 1                       |







**Table S4.** List of 105 hits from the *in vitro* assay against SARS-CoV-2 infection in Huh-7 cells with potency  $\leq 2 \mu\text{M}$  with methods as described in <sup>10</sup>.

| Drug Name               | DrugBank ID | Drug Name          | DrugBank ID | Drug Name       | DrugBank ID |
|-------------------------|-------------|--------------------|-------------|-----------------|-------------|
| Acebutolol              | DB01193     | Ethionamide        | DB00609     | Nintedanib      | DB09079     |
| Acetazolamide           | DB00819     | Ethosuximide       | DB00593     | Olmесartan      | DB00275     |
| Acetohexamide           | DB00414     | Ethotoin           | DB00754     | Omeprazole      | DB00338     |
| Alfuzosin               | DB00346     | Ezetimibe          | DB00973     | Ondansetron     | DB00904     |
| Allopurinol             | DB00437     | Fedratinib         | DB12500     | Ospemifene      | DB04938     |
| Alvimopan               | DB06274     | Fludarabine        | DB01073     | Oxybutynin      | DB01062     |
| Aminolevulinic acid     | DB00855     | Fludrocortisone    | DB00687     | Pamidronic acid | DB00282     |
| Amiodarone              | DB01118     | Gemcitabine        | DB00441     | Phentolamine    | DB00692     |
| Amprenavir              | DB00701     | Gilteritinib       | DB12141     | Phenytoin       | DB00252     |
| Apraclonidine           | DB00964     | Glasdegib          | DB11978     | Procainamide    | DB01035     |
| Avanafil                | DB06237     | Guanethidine       | DB01170     | Pyridoxine      | DB00165     |
| Bosutinib               | DB06616     | Hydroxychloroquine | DB01611     | Quinestrol      | DB04575     |
| Calcipotriol            | DB02300     | Ingenol mebutate   | DB05013     | Raloxifene      | DB00481     |
| Capsaicin               | DB06774     | Ivabradine         | DB09083     | Remdesivir      | DB14761     |
| Carbinoxamine           | DB00748     | Ketorolac          | DB00465     | Rivastigmine    | DB00989     |
| Carmustine              | DB00262     | Lapatinib          | DB01259     | Rocuronium      | DB00728     |
| Cefotaxime              | DB00493     | Levamisole         | DB00848     | Rofecoxib       | DB00533     |
| Cefoxitin               | DB01331     | Levofloxacin       | DB01137     | Sevoflurane     | DB01236     |
| Chloroxine              | DB01243     | Levomefolic acid   | DB11256     | Sildenafil      | DB00203     |
| Chlorthalidone          | DB00310     | Lomitapide         | DB08827     | Simvastatin     | DB00641     |
| Cidofovir               | DB00369     | Loperamide         | DB00836     | Tafamidis       | DB11644     |
| Cilostazol              | DB01166     | Loratadine         | DB00455     | Tamoxifen       | DB00675     |
| Clofazimine             | DB00845     | Meclizine          | DB00737     | Terconazole     | DB00251     |
| Dasatinib               | DB01254     | Mepivacaine        | DB00961     | Tetrabenazine   | DB04844     |
| Dexmedetomidine         | DB00633     | Meropenem          | DB00760     | Thalidomide     | DB01041     |
| Dienogest               | DB09123     | Mestranol          | DB01357     | Thioridazine    | DB00679     |
| Dipivefrin              | DB00449     | Metformin          | DB00331     | Tioguanine      | DB00352     |
| Domperidone             | DB01184     | Metoclopramide     | DB01233     | Trimethadione   | DB00347     |
| Dorzolamide             | DB00869     | Metoprolol         | DB00264     | Ulipristal      | DB08867     |
| Duvelisib               | DB11952     | Naratriptan        | DB00952     | Valproic acid   | DB00313     |
| Edaravone               | DB12243     | Nebivolol          | DB04861     | Vardenafil      | DB00862     |
| Eflornithine            | DB06243     | Nevirapine         | DB00238     | Verapamil       | DB00661     |
| Eliglustat              | DB09039     | Niclosamide        | DB06803     | Vilazodone      | DB06684     |
| Entecavir               | DB00442     | Nifedipine         | DB01115     | Zanamivir       | DB00558     |
| Eslicarbazepine acetate | DB09119     | Nilutamide         | DB00665     | Zonisamide      | DB00909     |

**Table S5.** Reference drugs identified using FQ score.

| Drug Name           | DrugBank ID | Molecular Weight | Drug Type                                              | Targets               | Z Score |
|---------------------|-------------|------------------|--------------------------------------------------------|-----------------------|---------|
| Alvimopan           | DB06274     | 424.53           | Peripherally acting $\mu$ opioid receptor antagonist   | NSP1                  | 2.25    |
| Aminolevulinic Acid | DB00855     | 131.13           | Photochemotherapy for actinic keratosis                | NSP3-PLP, Site 3      | 2.86    |
| Amprenavir          | DB00701     | 505.63           | HIV protease inhibitor                                 | Spike Protein, Site 6 | 2.47    |
|                     |             |                  |                                                        | NSP15, Site 1         | 2.23    |
|                     |             |                  |                                                        | NSP5, Site 2          | 2.11    |
|                     |             |                  |                                                        | NSP5, Site 1          | 2.11    |
|                     |             |                  |                                                        | NSP15, Site 3         | 2.09    |
| Avanafil            | DB06237     | 484.95           | Phosphodiesterase-5 inhibitor for erectile dysfunction | NSP15, Site 4         | 2.43    |
|                     |             |                  |                                                        | NSP15, Site 2         | 2.24    |
|                     |             |                  |                                                        | NSP3-PLP, Site 2      | 2.21    |
| Calcipotriol        | DB02300     | 412.60           | Treatment of plaque psoriasis                          | Spike Protein, Site 8 | 2.21    |
| Capsaicin           | DB06774     | 305.41           | Topical analgesic                                      | Spike Protein, Site 7 | 2.33    |
| Dipivefrin          | DB00449     | 351.44           | Prodrug of adrenaline                                  | NSP7,8,12, Site 3     | 2.60    |
| Domperidone         | DB01184     | 425.91           | Dopamine receptor antagonist                           | NSP3-ADRP             | 2.53    |
|                     |             |                  |                                                        | NSP3-PLP, Site 4      | 2.30    |
|                     |             |                  |                                                        | NSP3-SUD              | 2.16    |
| Eliglustat          | DB09039     | 404.55           | Glucosylceramide synthase inhibitor                    | NSP7,8,12, Site 3     | 3.03    |
|                     |             |                  |                                                        | NSP5, Site 3          | 2.44    |
|                     |             |                  |                                                        | NSP14, Site 1         | 2.27    |

|                  |         |        |                                          |                          |      |
|------------------|---------|--------|------------------------------------------|--------------------------|------|
|                  |         |        |                                          | Spike Protein, Site 7    | 2.12 |
| Levomefolic Acid | DB11256 | 459.46 | Food additive for folate deficiency      | Spike Protein, Site 1    | 2.06 |
| Metoprolol       | DB00264 | 267.36 | $\beta$ 1 adrenergic receptor antagonist | NSP7,8,12, Site 3        | 2.54 |
| Nintedanib       | DB09079 | 539.62 | Kinase inhibitor                         | Nucleocapsid, Site 4     | 2.35 |
|                  |         |        |                                          | Envelope Protein, Site 1 | 2.26 |
| Olmesartan       | DB00275 | 446.50 | Angiotensin II receptor antagonist       | Spike Protein, Site 2    | 2.40 |
| Ospemifene       | DB04938 | 378.89 | Selective estrogen receptor modulator    | Nucleocapsid, Site 3     | 2.03 |
| Oxybutynin       | DB01062 | 357.49 | Relief of overactive bladder             | Nucleocapsid, Site 3     | 2.32 |
|                  |         |        |                                          | Spike Protein, Site 7    | 2.01 |
| Tamoxifen        | DB00675 | 371.51 | Selective estrogen receptor modulator    | NSP14, Site 5            | 2.35 |
|                  |         |        |                                          | NSP3-NSP3a               | 2.28 |
| Terconazole      | DB00251 | 532.46 | 14-alpha-demethylase inhibitor in fungi  | NSP3-ADRP                | 2.52 |
|                  |         |        |                                          | NSP3-PLP, Site 1         | 2.11 |
|                  |         |        |                                          | Spike Protein, Site 2    | 2.01 |

Table S6. Number of Ions used in MD Simulations.

| Protein      | Drug                | Na <sup>+</sup> Ions | Cl <sup>-</sup> Ions |
|--------------|---------------------|----------------------|----------------------|
| NSP14        | Tamoxifen           | 0                    | 9                    |
| NSP15        | Avanafil            | 162                  | 0                    |
| NSP1         | Alvimopan           | 6                    | 0                    |
| NSP3-ADRP    | Domperidone         | 0                    | 0                    |
| NSP3-ADRP    | Terconazole         | 0                    | 0                    |
| NSP3-PLP     | Aminolevulinic Acid | 3                    | 0                    |
| NSP7,8,12    | Dipivefrin          | 12                   | 0                    |
| NSP7,8,12    | Eliglustat          | 12                   | 0                    |
| NSP7,8,12    | Metoprolol          | 12                   | 0                    |
| Nucleocapsid | Ospemifene          | 0                    | 84                   |
| Nucleocapsid | Oxybutynin          | 0                    | 85                   |
| Nucleocapsid | Nintedanib          | 0                    | 85                   |
| Spike        | Levomefolic Acid    | 59                   | 0                    |
| Spike        | Olmesartan          | 59                   | 0                    |
| Spike        | Amprenavir          | 57                   | 0                    |
| Spike        | Capsaicin           | 57                   | 0                    |
| Spike        | Calcipotriol        | 57                   | 0                    |

### 3. Supplemental References

1. Almeida, M. S., Johnson, M. A., Herrmann, T., Geralt, M. & Wüthrich, K. Novel beta-barrel fold in the nuclear magnetic resonance structure of the replicase nonstructural protein 1 from the severe acute respiratory syndrome coronavirus. *J Virol* **81**, 3151-3161 (2007).
2. Serrano, P. *et al.* Nuclear magnetic resonance structure of the N-terminal domain of nonstructural protein 3 from the severe acute respiratory syndrome coronavirus. *J Virol* **81**, 12049-12060 (2007).
3. Michalska, K. *et al.* Crystal structures of SARS-CoV-2 ADP-ribose phosphatase: from the apo form to ligand complexes. *IUCrJ* **7**, 814-824 (2020).
4. Tan, J. *et al.* The SARS-unique domain (SUD) of SARS coronavirus contains two macrodomains that bind G-quadruplexes. *PLoS Pathog* **5**, e1000428, doi:10.1371/journal.ppat.1000428 (2009).
5. Osipiuk, J. *et al.* The crystal structure of papain-like protease of SARS CoV-2. *Nature Communications*, **12**, 743 (2021).
6. Zhang, L. *et al.* Crystal structure of SARS-CoV-2 main protease provides a basis for design of improved  $\alpha$ -ketoamide inhibitors. *Science* **368**, 409-412 (2020).

7. Serrano, P. *et al.* Nuclear magnetic resonance structure of the nucleic acid-binding domain of severe acute respiratory syndrome coronavirus nonstructural protein 3. *J Virol* **83**, 12998-13008 (2009).
8. Xu, X., Z. Lou, Y. Ma, X. Chen, Z. Yang, X. Tong, Q. Zhao, Y. Xu, H. Deng, M. Bartlam and Z. Rao. "Crystal structure of the C-terminal cytoplasmic domain of non-structural protein 4 from mouse hepatitis virus A59." *PLoS One* **4**(7): e6217 (2009).
9. Ghosh, A. K. *et al.* Severe acute respiratory syndrome coronavirus papain-like novel protease inhibitors: design, synthesis, protein-ligand X-ray structure and biological evaluation. *J Med Chem* **53**, 4968-4979 (2010).
10. Báez-Santos, Y. M. *et al.* X-ray structural and biological evaluation of a series of potent and highly selective inhibitors of human coronavirus papain-like proteases. *J Med Chem* **57**, 2393-2412 (2014).
11. Owen, C. D. *et al.* SARS-CoV-2 main protease with unliganded active site. PDB ID 6YB7, DOI: 10.2210/pdb6YB7/pdb (2019).
12. Douangamath, A. *et al.* Crystallographic and electrophilic fragment screening of the SARS-CoV-2 main protease. *Nat Commun* **11**, 5047 (2020).
13. Gao, Y. *et al.* Structure of the RNA-dependent RNA polymerase from COVID-19 virus. *Science* **368**, 779-782 (2020).
14. Tan, K., Kim, Y., Jedrzejczak, R., Maltseva, N., Endres, M., Michalska, K., Joachimiak, A., The crystal structure of Nsp9 RNA binding protein of SARS CoV-2, PDB ID 6W4B, DOI: 10.2210/pdb6W4B/pdb (2020).
15. Rosas-Lemus, M. *et al.* High-resolution structures of the SARS-CoV-2 2'-5' triphosphatase. *Sci Signal* **13**, 651 (2020).
16. Jia, Z. *et al.* Delicate structural coordination of the Severe Acute Respiratory Syndrome coronavirus Nsp13 upon ATP hydrolysis. *Nucleic Acids Res* **47**, 6538-6550 (2019).
17. Ma, Y. *et al.* Structural basis and functional analysis of the SARS coronavirus nsp14-nsp10 complex. *Proc Natl Acad Sci U S A* **112**, 9436-9441 (2015).
18. Kim, Y. *et al.* Crystal structure of Nsp15 endoribonuclease NendoU from SARS-CoV-2. *Protein Sci* **29**, 1596-1605 (2020).
19. Walls, A. C. *et al.* Structure, Function, and Antigenicity of the SARS-CoV-2 Spike Glycoprotein. *Cell* **181**, 281-292 (2020).
20. Shang, J. *et al.* Cell entry mechanisms of SARS-CoV-2. *Proc Natl Acad Sci U S A* **117**, 11727-11734 (2020).
21. Surya, W., Li, Y. & Torres, J. Structural model of the SARS coronavirus E channel in LMPG micelles. *Biochim Biophys Acta Biomembr* **1860**, 1309-1317 (2018).

22. Chang, C., Michalska, K., Jedrzejczak, R., Maltseva, N., Endres, M., Godzik, A., Kim, Y., Joachimiak, A. Center for Structural Genomics of Infectious Diseases (CSGID). PDB ID 6VYO, DOI: 10.2210/pdb6VYO/pdb (2020).
23. Chen, C. Y. *et al.* Structure of the SARS coronavirus nucleocapsid protein RNA-binding dimerization domain suggests a mechanism for helical packaging of viral RNA. *J Mol Biol* **368**, 1075-1086 (2007).
